# Supplementary material
Source: MDPI journal article supplement (https://www.mdpi.com/2075-163X/10/10/886)
Supplement: s1 [file s1]

## Sheet: Table S1
Table S1. Results of 40Ar/39Ar study with stepwise heating of K-richterites from Chompolo rocks.
Sample: 13AL507		Mineral: K-richterite		m = 30.59 mg
T0C	t (min)	40Ar, 10-9 ncm3	40Ar/39Ar	±1σ	38Ar/39Ar	±1σ	37Ar/39Ar	±1σ	36Ar/39Ar	±1σ	Ca/K	∑39Ar	Age, Ma	±1σ
												(%)
J=0.003983±0.000042; integral age = 160.9±1.6 Ma
500	10	161,1	455,3	1108	0,216	0,00156	1,4	0,076	10306	0,00349	5,1	0,1	848,4	8,0
750	10	211,4	144,6	0,153	0,058	0,00094	0,7	0,022	0,1939	0,00107	2,4	0,5	538,5	5,2
850	10	586,2	26,4	0,005	0,018	0,00008	0,6	0,001	0,0123	0,00012	2,0	7,1	156,4	1,6
900	10	1165,2	24,6	0,004	0,017	0,00002	0,7	0,001	0,0068	0,00008	2,4	21,0	155,7	1,6
925	10	1160,6	23,9	0,004	0,017	0,00003	0,7	0,001	0,0034	0,00011	2,5	35,4	157,55	1,61
950	10	2927,5	23,7	0,004	0,017	0,00002	0,7	0,001	0,0022	0,00010	2,6	71,8	158,58	1,61
975	10	2150,6	24,6	0,003	0,017	0,00001	0,8	0,0003	0,0045	0,00009	2,7	97,6	160,09	1,62
1050	10	221,7	40,6	0,018	0,028	0,00017	0,8	0,004	0,0613	0,00042	3,0	99,2	154,62	1,77
1130	10	193,8	70,5	0,059	0,047	0,00046	0,8	0,008	0,1627	0,00084	2,8	100,0	154,50	2,26
Sample: 13AL613		Mineral: K-richterite		m = 24.79 mg
J=0.003461±0.000031; integral age = 138.0±1.2 Ma
500	10	63,9	375,3	2,59	0,263	0,0091	2187	0,258	11064	0,0103	7,9	0,1	279,2	11,3
650	10	49,7	179,1	0,96	0,141	0,0065	22018	0,204	0,5051	0,0061	79,3	0,2	177,5	9,4
800	10	92,6	139,9	0,22	0,100	0,0024	2984	0,072	0,3858	0,0016	10,7	0,4	154,7	2,9
950	10	2149,2	24,1	0,003	0,018	0,00002	0,694	0,001	0,0035	0,0001	2,5	32,1	138,6	1,2
975	10	1041,5	23,7	0,003	0,018	0,00003	0,680	0,001	0,0029	0,0001	2,4	47,8	137,5	1,2
1000	10	1292,2	23,6	0,003	0,018	0,00003	0,745	0,001	0,0025	0,0001	2,7	67,3	137,4	1,2
1025	10	1113,5	23,7	0,004	0,018	0,00003	0,822	0,001	0,0033	0,0001	3,0	84,0	136,9	1,2
1050	10	895,1	25,2	0,004	0,019	0,0001	1052	0,002	0,0076	0,0002	3,8	96,6	138,0	1,2
1075	10	153,2	32,0	0,01	0,024	0,0002	0,651	0,010	0,0303	0,0004	2,3	98,3	138,4	1,4
1130	10	168,9	35,9	0,02	0,030	0,0002	0,751	0,007	0,0438	0,0004	2,7	100,0	137,9	1,4

## Sheet: Table S2
Table S2. Representative compositions of the Cpx I and Cpx II clinopyroxene varieties in the Chompolo rocks.
Sample	1	2	3	4	5	6	7	8	9	10	11	12	13	14	15
SiO2	54.59	55.09	54.88	55.24	54.78	54.8	54.58	51.27	54.8	54.79	55.03	54.91	54.94	55.31	55.22
TiO2	0.11	0.05	0.08	0.02	0.02	0.16	0.05	0.02	0.14	0.04	0.03	0.04	0.04	0.16	0.06
Al2O3	1.83	1.64	3.2	3.83	3.49	4.02	1.13	4.42	2.21	0.46	0.56	0.46	0.6	2.75	8.91
Cr2O3	1.5	1.18	3.01	3.18	1.19	3.26	0.89	1.3	2.17	0.47	0.67	0.68	0.88	1.62	2.6
FeO	2.34	1.38	1.58	2.43	1.73	1.55	1.73	2.79	1.91	3.55	2.8	3.09	2.88	1.66	1.85
MnO	0.1	0.07	0.05	0.06	0.08	0.05	0.06	0.15	0.06	0.12	0.11	0.11	0.09	0.08	0.03
MgO	16.63	16.82	14.49	12.98	15.49	14.17	16.95	15.86	15.68	18.89	18.82	18.52	18.45	15.15	9.87
CaO	21.24	22.55	19.17	17.49	21.03	18.57	22.77	22.89	20.64	21.17	21.56	21.49	21.18	20.71	15.44
Na2O	1.36	1.26	3.03	4.07	2.19	3.47	1.1	0.43	2.32	0.47	0.48	0.4	0.49	1.96	5.14
K2O	0.01	0.01	bd	bd	0.02	bd	0.02	0.01	0.01	0.03	0.03	0.02	0.01	bd	bd
Сумма	99.69	100.05	99.49	99.3	100.02	100.05	99.28	99.14	99.95	100	100.1	99.7	99.56	99.4	99.11
f. %	6.6	3.8	4.7	5.8	3.7	2.7	3.3	6.5	2.8	7.6	6.8	8.6	8.1	9	9.5
Ca#*	47.9	49.1	48.7	49.2	49.4	48.5	49.1	50.9	48.6	44.6	45.2	45.5	45.2	49.6	52.9
Ca#=100Ca/(Ca+Mg);
Composition: 1-4 – Aldanskaya; 5-7 – Sputnik; 8-11- Gornaya; 12-14 – Perevalnaya; 15 - Ogonek.

## Sheet: Table S3
Table S3. Representative compositions of micas from the Sputnik pipe (1-21) and the Aldanskaya dyke (22-30); phlogopite inclusions in CPX rims from the Aldamskaya dyke (31-38). EPMA data (1-30) and EDS data (31-38).
	1	2	3	4	5	6	7	8	9	10	11	12	13	14	15	16	17	18	19	20	21	22	23	24	25	26	27	28	29	30	31	32	33	34	35	36	37	38
SiO2	35.04	35.04	34.9	34.95	35.15	35.5	35.03	35.2	34.29	36.13	34.66	34.68	34.58	35.8	34.46	35.33	34.5	37.97	35.3	35.03	34.78	37.589	36.882	36.068	36.838	36.607	36.395	35.851	36.151	41.3	43.09	42.81	44.26	44.65	42.08	43.47	44.41	45.91
TiO2	3.81	4.82	5.4	5.36	5.42	4.73	4.41	5.13	5.49	4.31	5.27	5.16	4.84	1.72	4.45	5.3	5.5	2.88	4.01	5.45	2.62	4.83	2.451	5.145	2.274	5.207	3.657	2.998	1.717	1.97	0.97	0.37	1.22	0.5	0.67	0.35	1.08	0.32
Al2O3	15.15	13.42	13.45	13.48	13.54	13.59	13.66	13.66	13.7	13.76	13.89	13.93	14.04	14.2	14.63	14.63	14.63	14.82	14.84	14.86	15.78	15.563	13.453	13.93	14.524	14.548	14.959	15.47	16.819	13.09	11	13.47	10.22	9.37	12.41	11.37	9.86	10.05
Cr2O3	0	0.14	0.19	0.158	0.101	0.134	0.143	0.148	0.012	0.09	0.149	0	0.127	0.017	0.283	0.122	0.149	0.047	0.118	0.061	0.061	0.131	0.023	0.121	0	0.152	0.086	0.021	0	0.05	0.57	1.49	0.73	0.38	1.81	0.76	0.92	1.14
FeOт *	18.04	19.39	19.43	20.32	19.29	17.5	19.65	18.62	21.62	13.6	19.01	19.08	19	16.21	18.8	15.47	18.32	8.31	16.99	19.23	19.73	16.687	19.851	18.326	20.134	17.261	15.18	20.501	16.854	2.82	6.46	5.62	5.65	6.09	4.62	4.12	5.71	3.04
MnO	0	0.08	0.097	0.075	0.093	0.098	0.075	0.096	0.075	0.071	0.088	0	0.073	0.369	0	0.108	0.178	0.029	0.022	0.074	0.198	0.093	0.325	0.121	0.283	0.097	0	0.519	0.125	0
MgO	11.04	11.06	10.72	10.1	10.72	12.42	11.27	11.44	9.39	15.89	11.16	10.95	11.13	14.51	11.18	13.29	11.04	19.64	12.66	10.64	10.71	11.216	9.973	10.891	10.621	12.165	14.312	9.786	13.882	25.51	24.36	23.63	24.36	24.21	24.28	25.12	22.98	24.51
CaO	0	0.042	0.017	0.006	0.042	0.006	0.069	0.012	0.013	0.168	0	0.011	0.011	0.188	0	0.036	0.03	0.552	0.088	0.034	0.013	0.732	0.299	0.859	0.204	0	0.569	0.916	1.405	0.01		1.61		1.69	0.28	0.53	1.67	3.65
Na2O	0.041	0.095	0.091	0.091	0.059	0.066	0.071	0.062	0.097	0.057	0.082	0.067	0.073	0.096	0.052	0.135	0.094	0.108	0.075	0.09	0.085	0.086	0.022	0.067	0.047	0.062	0.088	0.142	0.171	0.14	0	0.27	0	0.23	0.22	0	0.23	0.47
K2O	9.25	9.01	9	9.05	8.85	9.19	8.82	9.06	8.95	8.67	9.13	8.71	9.08	7.93	8.59	8.02	9.15	7.82	8.62	9.42	9.17	2.062	6.323	5.961	7.773	9.496	3.927	3.494	3.81	10.63	9.75	8.93	9.83	9.11	9.71	9.78	8.35	8.19
BaO	0.078	0.465	0.561	0.505	0.539	0.462	0.442	0.408	0.6	0.329	0.522	0.4	0.497	0.269	0.271	0.537	0.546	0.34	0.323	0.57	0.234	0.0934017	0.0746069	0.28558	0.116069	0.251418	0.0794613	0.18318	0.111521	0.25	0	1.33	0	0	0.66	0	0.55	0.71
NiO	0	0.012	0.031	0.015	0	0.013	0.01	0.017	0.003	0.038	0	0.068	0.03	0	0	0	0.01	0.006	0.01	0.016	0.008	0.106	0.085	0.048	0.015	0.033	0.323	0.202	0.258	0.03
F	0	0.894	0.786	0.897	0.788	0.798	0.86	0.913	0.601	0.794	0.844	0.423	0.764	1.54	0.563	0.843	0.833	0.625	0.778	0.894	1.13	0.547731	1.53941	0.392829	1.71122	0.565314	0.737077	0.71167	0.267028	5.43
Cl																						0.689	0.02	1.099	0.003	0.888	0.668	0.026	0.029	0.08
Sum	92.44	94.47	94.67	95	94.6	94.49	94.51	94.78	94.83	93.92	94.79	93.48	94.24	92.86	93.29	93.82	94.98	93.14	93.84	96.36	94.51	90.0101	90.63	92.8684	93.7863	96.8637	90.5	90.4789	91.4505	99	96.18	99.52	96.27	96.23	96.73	95.51	95.77	98
FeOт * - total Fe expressed as FeO; n.d. - not detected;

## Sheet: Table S4
Table S4. Mineral chemistry of amphiboles from the Aldanskaya dyke
	SiO2	TiO2	Al2O3	Cr2O3	FeO	MnO	MgO	CaO	Na2O	K2O	NiO	H2O*	F	Cl	Total
K-Richterite
1	57.7	0.12	bd	0.07	1.38	0.08	23.59	5.49	3.93	5.02	0.03	2.07	0.18	bd	99.66
2	58.01	0.11	0.01	0.26	2.26	0.05	23.37	4.1	4.91	4.47	0.08	2.08	0.15	bd	99.87
3	57.7	0.09	0.1	0.21	2.07	0.05	23.26	5.6	4.73	3.81	0.07	2.07	0.18	bd	99.94
4	58.65	0.08	0.06	0.14	2.04	0.04	23.5	5.93	4.08	3.84	0.04	2.12	0.13	0.01	100.65
5	57.76	0.09	bd	0.14	1.85	0.03	23.18	4.54	4.4	4.55	0.05	2.05	0.18	bd	98.83
6	58.42	0.1	bd	0.08	1.84	0.04	23.23	5.11	4.1	4.38	0.03	2.07	0.18	bd	99.59
7	57.43	0.09	bd	0.1	1.45	0.02	23.14	5.29	4.24	4.57	0.03	2.06	0.15	bd	98.57
8	57.39	0.1	0.01	0.11	1.82	0.04	22.79	5.23	4.11	5.07	0.05	1.97	0.34	bd	99.02
9	57.16	0.08	0.15	0.08	1.74	0.04	23.21	6.48	3.7	4.31	0.05	2.14	0	0.01	99.15
10	57.44	0.06	0.48	0.24	1.88	0.03	23.27	6.89	3.33	3.12	0.05	2.08	0.15	bd	99.02
11	57.62	0.09	0.14	0.09	1.78	0.03	23.54	6.66	3.95	4.27	0.04	2.16	bd	bd	100.37
Pargasite-Edenite
12	42.46	0.94	16.36	0.02	3.37	0.05	17.63	12.12	2	2.49	na	2.11	na	na	99.55
13	44.07	2.21	14.09	0.05	4.62	0.05	18.01	10.78	3.62	0.46	na	2.14	na	na	100.11
14	45.87	0.84	12.7	0.01	2.42	0.04	19.98	12.4	3.07	0.32	na	2.15	na	na	99.8
15	43.02	3.28	12.87	0.23	2.9	0.04	18.76	12.43	2.81	1.17	na	2.1	na	na	99.61
16	43.19	1.96	15.18	0.04	2.83	0.02	18.29	12.18	2.86	1.24	na	2.13	na	na	99.92
17	48.5	0.86	10.29	bd	2.56	0.05	20.87	11.96	2.55	0.57	na	2.17	na	na	100.38
18	46.92	1.09	11.29	0.01	3.32	0.09	19.87	11.85	2.67	0.6	na	2.15	na	na	99.85
19	45.95	1.87	11.85	bd	4.22	0.05	18.6	11.39	3.43	0.3	na	2.14	na	na	99.79
20	45.3	1.33	12.03	0.03	4.59	0.05	18.85	10.97	3.39	0.46	na	2.13	na	na	99.13
* H2O content calculated by stoichiometry.

## Sheet: Table S5
Table S5. Mineral chemistry of apatites from the Ogonek pipe
Mount №	SiO2	FeO	MnO	MgO	CaO	SrO	La2O3	Ce2O3	Pr2O3	Nd2O3	Na2O	P2O5	SO3	F	Cl	Total	Type
NEI18-1 130	0.015	0.306	0.735	0.159	53.503	0	0.046	0.11	0	0.061	0.132	41.663	0	2.129	0.415	98.284	I
NEI18-1 131	0.014	0.033	0.171	0	55.122	0.036	0.029	0.035	0	0.006	0.062	42.013	0.032	2.689	0.148	99.225	I
NEI18-1 132	0.019	0.018	0.3	0	55.133	0.045	0.026	0.011	0.013	0	0.051	41.964	0.029	2.76	0.134	99.311	I
NEI18-1 129	0.074	0.028	0.075	0	55.049	0.049	0.037	0.053	0	0.018	0.02	41.908	0.066	2.566	0.459	99.218	I
NEI18-1 128	0.023	0.041	0.159	0.004	55.056	0.005	0.032	0.025	0.006	0.047	0.053	41.995	0.007	3.009	0.112	99.282	I
NEI18-1 127	0.177	0.037	0.178	0.009	55.04	0.024	0.025	0.014	0.012	0.068	0.027	41.721	0.122	3.019	0.548	99.626	I
NEI18-1 119	0.143	0.509	0.122	1.098	52.003	1.219	0.113	0.231	0.019	0.168	0.134	40.792	0.106	1.102	0.058	97.34	I
NEI18-1 120	0.157	0.718	0.102	1.018	52.657	1.023	0.085	0.186	0.03	0.122	0.108	41.221	0.099	1.125	0.056	98.22	I
NEI18-1 124	0.666	0.877	0.023	0.139	53.928	0.672	0.036	0.065	0	0.045	0.074	40.332	0.485	1.733	0.146	98.458	I
NEI18-1 125	0.395	0.061	0.019	0.114	53.772	1.318	0.06	0.133	0.038	0.067	0.075	40.668	0.262	1.874	0.103	98.147	I
NEI18-1 123	0.74	0.061	0.013	0.152	54.677	0.475	0.038	0.077	0.047	0.032	0.049	40.453	0.463	2.424	0.132	98.782	I
NEI18-1 126	0.011	0.026	0.258	0.016	54.919	0.031	0.024	0.057	0.007	0.012	0.05	41.98	0.034	2.683	0.031	99.002	I
NEI18-1 122	0.491	0.024	0.047	0.006	54.496	0.027	0.156	0.323	0.022	0.163	0.065	40.843	0.248	2.444	0.696	98.865	I
NEI18-1 121	0.096	0.115	0.009	0.128	53.956	0.923	0.166	0.395	0.075	0.163	0.138	41.254	0.001	3.203	0.169	99.404	I
NEI18-1 108	0.163	0.21	0.18	0.243	51.954	3.021	0.16	0.317	0.053	0.168	0.183	40.327	0.074	2.037	0.009	98.239	I
NEI18-1 118	0.302	0.437	0.074	0.71	52.814	1.163	0.086	0.155	0.021	0.142	0.094	40.778	0.098	1.054	0.029	97.506	I
NEI18-1 114	0.094	0.084	0.136	0.05	53.733	0.141	0.131	0.276	0.02	0.098	0.114	40.793	0.123	1.128	3.516	99.169	I
NEI18-1 117	0.265	0.386	0.091	0.684	53.115	1.252	0.096	0.155	0.022	0.084	0.071	41.198	0.087	1.179	0.027	98.21	I
NEI18-1 104	0.147	0.58	0.121	1.034	52.389	1.088	0.085	0.207	0.003	0.127	0.108	40.942	0.098	1.209	0.052	97.669	I
NEI18-1 103	0.154	0.846	0.157	1.052	52.154	1.071	0.094	0.211	0.005	0.122	0.2	41.154	0.101	1.231	0.061	98.081	I
NEI18-1 113	0.116	0.59	0.117	0.859	52.186	1.12	0.097	0.2	0.016	0.13	0.113	40.882	0.076	1.235	0.039	97.247	I
NEI18-1 109	0.036	0.027	0.096	0.008	54.892	0.058	0.03	0.027	0.032	0.01	0.052	41.908	0.037	2.091	0.096	98.498	I
NEI18-1 112	0.485	0.156	0.04	0.13	53.962	1.035	0.068	0.121	0.008	0.038	0.163	40.645	0.802	2.166	0.17	99.039	I
NEI18-1 105	0.424	0.044	0.015	0.026	54.467	0.338	0.139	0.224	0	0.078	0.085	40.543	0.448	2.111	0.238	98.237	I
NEI18-1 111	0.407	0.11	0.034	0.226	53.959	1.246	0.025	0.088	0.003	0	0.104	40.485	0.286	2.239	0.14	98.377	I
NEI18-1 116	0.157	0.057	0.012	0.064	54.552	0.093	0.051	0.107	0.058	0.101	0.159	41.293	0.258	2.67	0.312	98.75	I
NEI18-1 1	0.155	0.655	0.095	1.072	52.599	0.757	0.063	0.136	0.004	0.093	0.082	41.255	0.092	1.062	0.06	97.719	II
NEI18-1 27	0.028	0.169	0.04	0.768	51.954	1.946	0.157	0.256	0.005	0.11	0.119	40.871	0.025	0.475	0.128	96.822	II
NEI18-1 101	0.013	0.028	0.057	0.015	53.868	0.863	0.01	0.001	0.019	0.005	0.041	41.665	0.063	0.705	0.075	97.114	II
NEI18-1 16	0.031	0.2	0.05	0.66	52.014	2.264	0.105	0.241	0.015	0.131	0.105	41.523	0.041	0.809	0.052	97.888	II
NEI18-1 21	0.036	0.623	0.119	0.887	52.879	0.56	0.057	0.1	0.012	0.074	0.064	41.699	0.053	0.961	0.061	97.766	II
NEI18-1 9	0.294	0.474	0.085	0.719	54.049	1.913	0.095	0.135	0.026	0.067	0.095	41.239	0.086	0.963	0.032	99.86	II
NEI18-1 50	0.108	0.669	0.126	1.007	52.415	0.766	0.063	0.113	0.02	0.112	0.098	41.139	0.083	0.991	0.044	97.327	II
NEI18-1 14	0.166	0.724	0.109	1.105	52.149	0.869	0.069	0.152	0.018	0.098	0.133	40.923	0.114	1	0.06	97.254	II
NEI18-1 31	0.126	0.563	0.106	0.915	52.385	0.955	0.067	0.182	0.01	0.098	0.106	41.092	0.091	1.004	0.051	97.316	II
NEI18-1 69	0.072	0.265	0.101	0.692	52.667	1.139	0.099	0.239	0.047	0.163	0.099	41.264	0.141	1.009	0.061	97.619	II
NEI18-1 38	0.19	0.849	0.116	1.091	51.827	0.962	0.104	0.196	0.005	0.1	0.125	41.003	0.109	1.009	0.052	97.301	II
NEI18-1 37	0.145	0.73	0.126	1.043	52.13	0.995	0.08	0.147	0.052	0.151	0.099	40.996	0.089	1.02	0.057	97.418	II
NEI18-1 92	0.287	0.442	0.083	0.681	52.71	1.174	0.079	0.157	0.052	0.117	0.091	41.086	0.101	1.028	0.029	97.677	II
NEI18-1 85	0.11	0.698	0.125	0.955	52.392	0.876	0.062	0.129	0	0.086	0.096	41.314	0.088	1.029	0.05	97.566	II
NEI18-1 58	0.188	0.745	0.137	1.109	51.842	1.086	0.091	0.203	0.025	0.11	0.131	40.747	0.115	1.029	0.064	97.175	II
NEI18-1 75	0.068	0.292	0.111	0.694	52.551	1.192	0.126	0.277	0.051	0.133	0.098	41.057	0.109	1.032	0.056	97.399	II
NEI18-1 87	0.123	0.658	0.118	1.007	52.096	1.032	0.097	0.172	0.063	0.077	0.123	40.758	0.089	1.035	0.043	97.045	II
NEI18-1 17	0.232	0.93	0.15	1.204	51.669	1.103	0.118	0.214	0.047	0.151	0.141	40.806	0.142	1.038	0.064	97.558	II
NEI18-1 33	0.133	0.67	0.098	1.074	52.227	0.866	0.084	0.153	0.061	0.032	0.118	40.947	0.105	1.043	0.065	97.222	II
NEI18-1 89	0.125	0.647	0.117	0.962	52.246	1.059	0.077	0.228	0.001	0.075	0.12	41.008	0.076	1.053	0.047	97.387	II
NEI18-1 46	0.171	0.752	0.117	1.062	52.06	1.022	0.09	0.182	0	0.136	0.132	40.605	0.112	1.053	0.064	97.101	II
NEI18-1 49	0.155	0.634	0.099	1.007	52.29	0.882	0.07	0.134	0.034	0.1	0.123	40.914	0.114	1.055	0.061	97.214	II
NEI18-1 13	0.082	0.481	0.122	0.904	52.597	1.038	0.068	0.149	0	0.076	0.098	41.201	0.072	1.066	0.048	97.542	II
NEI18-1 43	0.04	0.538	0.092	0.804	52.853	0.696	0.058	0.088	0	0.089	0.083	41.342	0.053	1.073	0.053	97.398	II
NEI18-1 67	0.173	0.92	0.124	1.29	51.512	1.056	0.097	0.213	0.024	0.126	0.134	40.815	0.101	1.075	0.057	97.251	II
NEI18-1 41	0.096	0.686	0.121	0.956	52.228	1.037	0.087	0.152	0.024	0.096	0.107	40.876	0.079	1.08	0.044	97.204	II
NEI18-1 39	0.069	0.344	0.09	0.707	52.777	1.082	0.097	0.176	0.013	0.11	0.098	41.031	0.108	1.081	0.051	97.367	II
NEI18-1 78	0.127	0.689	0.118	0.944	52.319	0.988	0.052	0.178	0.031	0.099	0.091	41.124	0.088	1.096	0.056	97.526	II
NEI18-1 2	0.044	0.044	0.022	0.105	41.689	15.574	0.376	1.1	0.049	0.266	0.356	37.214	0	0.499	0.034	97.154	III
NEI18-1 22	0.04	0.039	0.027	0.098	43.529	12.561	0.436	0.775	0.069	0.249	0.275	38.295	0.017	0.616	0.119	96.859	III
NEI18-1 26	0.063	0.046	0.027	0.08	42.407	12.899	0.387	0.989	0.138	0.534	0.363	37.82	0.011	0.851	0.031	96.281	III
NEI18-1 100	0.078	0.042	0.029	0.072	45.354	10.163	0.349	0.762	0.086	0.331	0.285	38.766	0.014	0.483	0.048	96.648	III
NEI18-1 55	0.048	0.047	0.039	0.046	49.408	6.626	0.218	0.206	0.068	0.177	0.164	39.888	0.01	0.64	0.131	97.417	III
NEI18-1 80	0.004	0.018	0.045	0.004	51.463	4.532	0.015	0.047	0.028	0.027	0.052	40.531	0.025	0.961	0.013	97.357	III

## Sheet: Table S6
Table S6. Representative compositions of pyrope xenocrysts from the Ogonek (1-50); Aldanskaya dyke (51-100); Gornaya (101-150); Sputnik (151-200) pipes.
Ca#=100Ca/(Ca+Mg+Fe), Mg#=100Mg/(Mg+Fe+Mn).
№	SiO2	TiO2	Al2O3	Cr2O3	FeO	MnO	MgO	CaO	Na2O	Total	Mg#	Ca#	Kn. mol.%
1	41.47	0	19.728	4.586	9.208	0.61	18.319	5.773	0.021	99.715	76.8642	15.0185	0.270201
2	40.936	0	19.682	4.588	8.837	0.67	18.291	6.105	0.013	99.122	77.403	15.8807	0
3	41.499	0	19.741	5.008	8.466	0.506	20.052	4.299	0.019	99.59	79.9188	11.0809	4.65355
4	41.535	0.001	19.303	5.439	8.37	0.534	19.867	4.723	0.023	99.795	79.8914	12.145	5.35767
5	41.304	0.002	19.43	4.943	8.759	0.594	20.207	3.946	0.023	99.208	79.368	10.1471	6.40963
6	41.157	0.003	19.34	5.262	8.718	0.567	18.153	6.254	0.001	99.455	77.6847	16.326	0.418842
7	41.377	0.006	19.97	4.355	8.758	0.505	18.852	5.753	0.016	99.592	78.3745	14.8237	0
8	41.679	0.008	20.186	4.322	8.55	0.626	20.113	4.395	0.03	99.909	79.6025	11.2568	2.89668
9	41.785	0.008	19.872	4.601	8.703	0.664	19.512	4.705	0.019	99.869	78.7624	12.1776	3.11776
10	41.546	0.01	19.634	4.794	8.288	0.521	19.32	5.215	0.036	99.364	79.614	13.5259	2.24326
11	41.242	0.013	19.806	4.265	9.192	0.572	18.308	5.683	0.014	99.095	76.9523	14.8298	0
12	41.756	0.013	19.543	5.502	7.713	0.448	20.832	3.834	0.023	99.664	81.9676	9.87412	7.06425
13	41.652	0.015	19.614	5.106	7.858	0.435	19.143	5.955	0.023	99.801	80.4331	15.3821	0.866483
14	41.147	0.016	19.374	5.099	8.937	0.548	18.537	5.952	0.024	99.634	77.6789	15.3758	1.22346
15	41.397	0.016	18.847	6.004	8.745	0.533	18.275	6.307	0.018	100.142	77.8144	16.3602	2.74679
16	41.503	0.018	19.788	4.663	8.518	0.58	20.841	3.231	0.018	99.16	80.31	8.31305	7.11209
17	41.097	0.02	18.569	6.245	7.768	0.436	18.87	6.131	0.01	99.146	80.3766	15.9496	3.87308
18	41.794	0.021	21.049	3.321	9.146	0.516	19.111	5.15	0.026	100.134	77.8873	13.2494	0
19	41.094	0.022	19.625	4.717	9.073	0.558	18.444	5.86	0.036	99.429	77.3248	15.1834	0.201282
20	41.336	0.022	19.286	5.266	8.048	0.499	18.771	6.165	0.014	99.407	79.6363	15.9903	1.11379
21	41.303	0.022	18.925	5.895	7.567	0.43	19.648	5.574	0.001	99.365	81.396	14.363	4.45564
22	41.31	0.023	19.84	4.141	9.241	0.564	17.926	5.871	0.112	99.028	76.5012	15.4433	0
23	41.139	0.023	19.234	5.418	8.922	0.632	18.4	5.809	0.021	99.598	77.4217	15.1415	2.0588
24	41.437	0.023	18.749	5.993	8.061	0.487	18.233	6.889	0.021	99.893	79.159	17.8747	1.50428
25	41.401	0.024	19.703	4.868	8.95	0.567	18.424	5.865	0.031	99.833	77.5136	15.2432	0.276254
26	41.916	0.026	21.287	2.751	7.303	0.357	20.38	5.284	0.021	99.325	82.5732	13.435	0
27	41.41	0.026	19.85	4.493	8.754	0.613	19.084	5.166	0.039	99.435	78.3902	13.4035	1.39719
28	41.776	0.029	20.028	4.541	8.491	0.555	21.023	3.118	0.031	99.592	80.5376	7.99781	6.8467
29	40.895	0.029	17.34	6.988	8.513	0.636	16.728	7.617	0.018	98.764	76.4998	20.2968	3.45148
30	41.133	0.03	19.519	4.629	9.57	0.701	17.105	7.046	0.022	99.755	74.7798	18.3938	0
31	41.475	0.031	19.85	4.572	8.785	0.605	19.063	5.157	0.046	99.584	78.3302	13.3851	1.50731
32	41.739	0.033	20.163	4.503	8.575	0.594	18.905	5.553	0.031	100.096	78.5919	14.4083	0
33	40.881	0.033	18.282	6.315	10.51	0.569	15.749	7.852	0.023	100.214	71.6832	20.6849	0
34	41.818	0.037	21.452	2.481	8.496	0.413	19.77	5.015	0.042	99.524	79.8065	12.8117	0
35	41.854	0.04	21.907	1.991	8.062	0.379	20.198	5.108	0.037	99.576	80.9943	12.9338	0
36	40.975	0.041	18.969	5.379	8.741	0.514	18.403	6.261	0.039	99.322	77.9778	16.1868	1.66062
37	41.235	0.043	18.73	5.789	9.101	0.603	18.057	6.157	0.038	99.753	76.8157	16.0441	3.02449
38	41.51	0.044	22.268	1.086	10.499	0.37	18.107	5.459	0.018	99.361	74.7945	14.0558	0
39	41.171	0.047	20.82	2.841	9.092	0.583	19.502	4.408	0.036	98.5	78.2098	11.411	0
40	41.136	0.048	18.525	6.137	8.06	0.495	18.358	6.479	0.021	99.259	79.2579	16.9149	2.9467
41	41.281	0.049	18.721	5.929	8.561	0.621	18.809	5.581	0.018	99.57	78.4816	14.5248	4.84132
42	41.95	0.051	22.16	1.647	9.457	0.445	19.553	4.67	0.022	99.955	77.8604	11.899	0
43	40.686	0.052	18.314	5.785	10.926	0.536	16.098	7.261	0.005	99.663	71.4388	19.0182	0.827501
44	41.675	0.053	19.992	4.621	8.534	0.618	19.975	4.419	0.044	99.931	79.5333	11.3708	3.50589
45	40.819	0.056	18.637	5.932	9.133	0.63	17.875	6.426	0.024	99.532	76.5255	16.7273	2.49942
46	41.454	0.057	19.263	4.99	8.554	0.642	18.677	5.3	0.044	98.981	78.3361	13.9643	2.82359
47	40.87	0.058	18.358	6.103	8.934	0.538	17.714	6.363	0.039	98.977	76.9062	16.7562	3.19609
48	41.371	0.058	18.652	6.218	8.483	0.506	18.091	6.386	0.02	99.785	78.184	16.7307	2.97105
49	41.467	0.06	19.346	5.075	8.84	0.631	19.37	4.609	0.074	99.472	78.4548	11.987	4.75099
50	41.072	0.062	20.436	3.4	9.201	0.497	18.612	5.728	0.029	99.037	77.3637	14.7642	0
51	40.3	0.063	18.757	5.693	12.194	0.646	16.484	5.967	0	100.104	69.5702	15.5343	2.77959
52	40.393	0.229	20.415	2.446	15.004	0.688	14.89	6.079	0.011	100.155	62.8248	15.7896	0
53	40.567	0.036	18.61	6.167	9.158	0.62	17.983	6.527	0.021	99.689	76.6063	16.8713	2.53588
54	40.591	0.36	17.882	6.842	9.301	0.6	17.247	6.862	0.059	99.744	75.62	18.0058	4.14266
55	40.605	0.168	18.563	6.303	7.83	0.479	18.527	6.458	0.034	98.967	79.8812	16.8448	2.68392
56	40.616	0.186	20.401	2.508	13.719	0.571	15.894	5.869	0.027	99.791	66.4542	15.1719	0
57	40.692	0.196	19.694	3.552	12.375	0.39	16.666	6.281	0.024	99.87	69.9308	16.0557	0
58	40.737	0.243	17.894	6.787	9.051	0.591	18.237	6	0.079	99.619	77.1054	15.6129	6.50653
59	40.75	0.072	19.052	5.801	9.274	0.701	17.779	6.249	0.018	99.696	76.0381	16.3519	1.43859
60	40.759	0.032	18.401	6.644	8.473	0.515	17.708	6.883	0.018	99.433	77.8186	18.0534	2.25041
61	40.776	0.041	18.594	6.38	9.074	0.566	18.298	5.878	0.002	99.609	77.1685	15.3031	4.41264
62	40.783	0.419	18.222	6.363	8.995	0.592	18.168	5.919	0.086	99.547	77.1393	15.4911	5.34712
63	40.798	0.055	18.405	6.096	10.772	0.515	16.794	6.566	0.012	100.013	72.6019	17.1293	2.84917
64	40.799	0.013	18.393	6.364	9.444	0.658	16.915	7.242	0.005	99.833	74.8827	18.988	1.2638
65	40.809	0.067	19.627	4.93	9.334	0.597	18.557	5.475	0.03	99.426	76.8907	14.1947	1.18675
66	40.81	0.118	18.732	6.167	8.049	0.53	19.126	5.699	0.038	99.269	79.8778	14.7707	4.36887
67	40.86	0.099	18.151	6.387	8.587	0.56	18.418	6.376	0.024	99.462	78.1913	16.4774	4.7674
68	40.866	0.234	18.81	5.72	9.026	0.596	18.153	5.977	0.044	99.426	77.0604	15.6178	2.95087
69	40.868	0.185	21.222	1.51	13.773	0.471	16.335	5.689	0.012	100.065	67.1347	14.528	0
70	40.875	0.199	19.366	5.224	8.998	0.59	19.048	5.428	0.044	99.772	77.961	13.9378	2.79402
71	40.877	0.108	18.837	5.919	8.711	0.557	18.94	5.524	0	99.473	78.443	14.2864	4.56265
72	40.878	0.152	19.285	5.204	9.214	0.616	18.648	5.401	0.027	99.425	77.1576	14.0178	2.78449
73	40.895	0.079	18.316	6.805	8.947	0.595	17.486	6.665	0.017	99.805	76.5421	17.5538	3.29249
74	40.92	0.101	20.093	4.267	9.198	0.588	18.982	5.294	0.033	99.476	77.5477	13.6181	0.0507576
75	40.92	0.041	18.669	6.393	8.298	0.442	18.372	6.726	0.047	99.908	78.9182	17.3548	2.18217
76	40.929	0.259	18.024	6.627	9.45	0.614	18.184	5.912	0.076	100.075	76.2879	15.3242	6.52132
77	40.939	0.123	19.454	4.988	8.849	0.495	19.198	5.465	0.054	99.565	78.5351	13.9864	2.22873
78	40.947	0.273	18.392	6.478	8.603	0.573	18.183	6.289	0.083	99.821	77.9169	16.4229	4.02797
79	40.958	0.026	19.289	5.642	8.785	0.593	19.127	5.057	0.012	99.489	78.4089	13.1292	4.00018
80	40.96	0.195	19.812	4.586	9.322	0.539	18.686	5.35	0.047	99.497	77.1397	13.8544	0.855293
81	40.964	0.208	21.164	1.223	13.717	0.498	16.317	5.658	0	99.749	67.1548	14.4857	0
82	40.977	0.097	18.343	6.368	9.593	0.611	16.706	7.22	0.016	99.931	74.4588	19.0283	1.44656
83	40.994	0.052	18.083	6.997	8.592	0.493	17.908	6.666	0	99.785	77.8278	17.4138	4.47737
84	40.995	0.244	19.892	4.696	8.697	0.555	19.078	5.208	0.052	99.417	78.5946	13.5163	1.06993
85	41.021	0.04	17.753	7.416	8.883	0.623	17.004	7.003	0.001	99.744	76.1045	18.6316	4.43445
86	41.023	0.016	19.748	4.832	8.843	0.487	19.165	5.501	0.012	99.627	78.5315	14.0838	1.21567
87	41.023	0.215	19.139	5.192	9.015	0.552	18.517	5.933	0.034	99.62	77.5105	15.3212	2.1284
88	41.026	0.218	18.766	5.867	8.92	0.535	18.114	6.449	0.043	99.938	77.3319	16.7049	2.3568
89	41.031	0.08	17.778	7.119	8.854	0.529	17.574	6.708	0.033	99.706	76.933	17.6239	5.17106
90	41.037	0.283	19.52	3.68	12.166	0.384	16.62	6.385	0.027	100.102	70.229	16.373	0
91	41.038	0.102	18.128	6.707	8.132	0.482	18.133	6.968	0.028	99.718	78.9408	18.0819	3.50798
92	41.045	0.023	19.015	5.83	8.433	0.516	19.016	5.599	0	99.477	79.0962	14.4939	3.75581
93	41.057	0.065	20.005	4.675	9.225	0.648	18.635	5.399	0.026	99.735	77.0675	14.0168	0.245229
94	41.058	0.103	19.216	5.491	8.903	0.617	18.96	5.682	0.047	100.077	78.003	14.5685	2.94633
95	41.063	0.024	19.023	5.62	8.725	0.591	17.678	6.887	0	99.611	77.1625	17.9888	0
96	41.063	0.072	18.504	6.334	9.314	0.642	17.485	6.528	0.02	99.962	75.7693	17.1262	2.95731
97	41.073	0.062	18.644	6.176	8.761	0.512	18.123	6.606	0.031	99.988	77.6797	17.0915	2.53649
98	41.075	0.227	18.159	6.637	9.312	0.516	17.17	6.868	0.047	100.011	75.6758	18.0654	3.2589
99	41.078	0.146	19.125	5.586	8.649	0.605	18.65	5.581	0.052	99.472	78.2055	14.5827	2.98105
100	41.09	0.014	18.754	6.038	8.771	0.545	18.111	6.803	0.003	100.129	77.5872	17.5159	1.83187
101	40.19	0.067	15.589	9.921	8.016	0.425	16.144	9.096	0.006	99.454	77.3036	24.0591	7.1693
102	40.566	0.006	18.749	5.878	8.577	0.518	17.898	6.807	0	98.999	77.7986	17.7287	0.847773
103	40.595	0.033	18.232	6.43	10.39	0.54	15.874	7.647	0.011	99.752	72.117	20.2113	0.204123
104	40.703	0.116	19.301	5.069	9.338	0.65	18.48	5.338	0.02	99.015	76.7135	13.9265	2.47627
105	40.768	0.027	18.678	6.107	8.347	0.439	18.133	6.614	0.018	99.131	78.6115	17.2466	1.79449
106	40.778	0.035	18.559	5.982	9.972	0.756	15.182	8.601	0.006	99.871	71.5873	22.9357	0
107	40.805	0.078	18.583	6.155	8.163	0.479	18.273	6.573	0.008	99.117	79.0147	17.1351	2.3836
108	40.852	0.113	18.583	6.05	9.706	0.564	17.275	6.406	0.03	99.579	74.9709	16.8539	2.47302
109	40.879	0.153	18.712	6.028	8.577	0.502	18.713	5.991	0.024	99.579	78.5882	15.4755	3.79257
110	40.88	0.036	17.452	7.418	8.59	0.617	17.033	7.626	0.037	99.689	76.711	20.0571	3.85655
111	40.888	0.263	18.264	6.474	8.954	0.537	17.816	6.546	0.049	99.791	76.9725	17.0849	3.80082
112	40.896	0.191	18.619	6.151	8.897	0.6	18.345	5.974	0.051	99.724	77.4746	15.5436	4.00714
113	40.899	0.201	20.073	3.802	11.638	0.565	17.638	4.696	0.03	99.542	72.0212	12.2573	0.869548
114	40.901	0.123	18.031	6.758	8.733	0.601	17.364	6.951	0.025	99.487	76.8105	18.3315	3.34241
115	40.935	0.097	18.082	7.023	8.992	0.63	17.3	6.829	0.04	99.928	76.1977	18.014	3.70116
116	40.939	0.003	18.048	6.886	8.686	0.543	17.216	7.365	0.015	99.701	76.8608	19.3359	2.37671
117	40.945	0.281	19.14	5.082	8.986	0.564	18.06	6.077	0.078	99.213	77.103	15.9043	1.05922
118	40.947	0.022	18.406	6.359	8.691	0.631	17.353	7.161	0.017	99.587	76.8214	18.805	1.44371
119	40.964	0.085	18.29	6.478	9.398	0.674	17.508	6.386	0.032	99.815	75.5797	16.7732	3.97475
120	40.965	0.056	17.92	7.037	8.66	0.547	17.752	6.486	0.005	99.428	77.4431	17.0972	5.17976
121	40.967	0.096	19.264	4.075	7.941	0.435	18.816	5.572	0.047	97.213	80.0018	14.6861	0.763617
122	40.971	0.035	18.868	5.808	9.198	0.605	17.96	6.09	0.022	99.557	76.5379	15.9219	2.51671
123	40.974	0.242	20.101	4.328	9.787	0.563	18.621	5.161	0.091	99.868	76.212	13.3361	0.234234
124	40.977	0.127	18.337	6.734	9.077	0.586	17.628	6.708	0.06	100.234	76.4613	17.5093	3.31481
125	40.987	0.112	17.26	7.689	8.827	0.585	16.873	7.841	0.047	100.221	76.1454	20.5268	4.36892
126	40.996	0.089	17.64	7.303	8.558	0.564	17.829	6.603	0.029	99.611	77.6794	17.3396	6.06159
127	41.009	0.082	19.191	5.592	8.954	0.646	18.529	5.59	0.04	99.633	77.4595	14.5762	2.77713
128	41.011	0.348	18.911	5.571	9.557	0.59	18.623	5.028	0.095	99.734	76.5703	13.0973	5.12486
129	41.018	0.24	20.789	3.045	9.152	0.513	19.111	5.157	0.03	99.055	77.882	13.2635	0
130	41.027	0.229	18.27	6.571	8.889	0.547	17.681	6.559	0.068	99.841	76.9404	17.2202	3.65189
131	41.043	0.242	17.584	7.048	10.471	0.529	16.277	7.081	0.073	100.348	72.4915	18.6868	4.58753
132	41.047	0.088	18.896	5.713	9.313	0.653	17.861	6.021	0.005	99.597	76.1393	15.7898	2.63858
133	41.052	0.02	18.497	6.602	7.822	0.43	18.089	7.248	0.023	99.783	79.607	18.8198	1.4724
134	41.053	0.078	17.889	7.118	8.996	0.619	17.075	7.026	0.046	99.9	75.973	18.5889	3.79237
135	41.053	0.107	17.538	7.345	9.234	0.621	17.707	6.41	0.03	100.045	76.186	16.7602	7.15396
136	41.054	0.049	18.579	6.006	10.583	0.549	17.69	5.512	0.026	100.048	73.8903	14.3629	5.21489
137	41.084	0.115	18.398	6.606	8.222	0.53	18.424	6.28	0.052	99.711	78.9403	16.3871	4.20552
138	41.087	0.16	21.609	1.395	16.01	0.537	14.56	5.499	0.004	100.861	61.0494	14.3779	0
139	41.097	0.047	18.688	5.889	10.482	0.556	17.587	5.528	0.028	99.902	73.941	14.4823	4.60085
140	41.107	0.081	18.81	6.038	7.714	0.426	18.627	6.653	0	99.456	80.2958	17.2439	1.82908
141	41.116	0.199	19.468	4.582	10.329	0.574	17.36	6.479	0.027	100.134	73.9272	16.7474	0
142	41.135	0.115	18.244	6.558	8.396	0.591	18.299	6.205	0.047	99.59	78.3801	16.2393	4.83159
143	41.141	0.112	19.616	4.963	8.674	0.524	18.729	5.751	0.012	99.522	78.3824	14.9102	0.890702
144	41.149	0.026	18.324	6.7	8.391	0.476	17.549	7.009	0.022	99.646	77.8975	18.4609	2.3211
145	41.149	0.091	18.83	6.184	8.042	0.493	18.73	6.188	0.009	99.716	79.6238	16.0661	3.10056
146	41.151	0.208	18.174	6.598	8.266	0.527	18.136	6.583	0.062	99.705	78.5988	17.2061	4.13837
147	41.156	0.105	19.078	5.677	8.843	0.587	18.21	6.329	0.057	100.042	77.4694	16.4139	1.50907
148	41.165	0.158	18.581	6.282	8.84	0.564	18.659	5.639	0.037	99.925	77.9397	14.6502	5.36599
149	41.174	0.006	18.661	6.234	7.864	0.417	18.134	6.893	0	99.383	79.5908	18.0195	1.50075
150	41.174	0.154	19.285	5.494	9.303	0.464	18.468	5.785	0.027	100.154	77.1033	14.9357	2.3661
151	40.681	0.075	18.734	5.422	9.183	0.578	18.212	6.231	0.015	99.131	76.8642	16.0887	2.44565
152	40.701	0.019	19.426	4.857	8.42	0.457	18.919	5.973	0.015	98.787	79.1465	15.371	0.515412
153	40.716	0.205	20.488	2.175	13.457	0.566	16.127	5.844	0.004	99.582	67.1949	15.0704	0
154	40.75	0.194	20.162	3.557	9.437	0.527	19.011	5.056	0.063	98.757	77.2608	13.0096	0
155	40.817	0.032	18.222	6.437	7.393	0.424	18.973	6.708	0.002	99.008	81.2106	17.2587	3.76686
156	40.82	0.203	19.64	3.829	12.132	0.588	16.348	6.246	0.011	99.817	69.5947	16.2431	0
157	40.84	0.276	21.007	1.282	12.373	0.373	17.35	5.744	0	99.245	70.8009	14.5296	0
158	40.874	0.149	20.076	2.813	13.361	0.563	15.805	6.181	0	99.822	66.9058	16.0162	0
159	40.875	0.042	18.774	5.731	9.723	0.699	17.604	6.198	0.018	99.664	75.0462	16.1947	2.47955
160	40.958	0.204	18.659	5.347	9.682	0.471	16.737	7.456	0.065	99.579	74.5924	19.4714	0
161	40.966	0.208	20.653	2.435	11.757	0.555	17.144	5.784	0.076	99.578	71.2638	14.905	0
162	40.982	0.356	20.96	2.448	10.596	0.501	18.76	4.577	0.131	99.311	75.0673	11.7539	0
163	40.988	0.067	19.015	5.316	8.992	0.502	18.446	6.111	0.051	99.488	77.578	15.7559	1.93456
164	40.995	0.215	21.231	1.156	13.173	0.489	16.807	5.538	0.008	99.612	68.6639	14.1289	0
165	40.998	0.219	20.411	2.163	13.204	0.481	16.238	5.862	0.011	99.587	67.8816	15.1266	0
166	40.998	0.225	18.595	5.785	8.571	0.501	18.65	5.988	0.086	99.399	78.5444	15.5059	3.81887
167	41.013	0.221	21.145	1.121	13.235	0.496	16.745	5.549	0	99.525	68.4756	14.1667	0
168	41.022	0.182	21.112	1.293	12.366	0.367	17.344	5.73	0.044	99.46	70.8149	14.5044	0
169	41.06	0.219	18.577	4.856	12.367	0.541	15.948	6.62	0.09	100.278	68.7548	17.2153	1.33242
170	41.079	0.206	18.479	6.075	8.285	0.478	18.71	6.147	0.063	99.522	79.1758	15.9097	4.13477
171	41.089	0.205	19.51	4.301	10.706	0.665	17.244	5.585	0.027	99.332	72.9755	14.7263	0.609879
172	41.105	0.061	19.179	5.139	9.023	0.537	18.204	6.035	0.024	99.307	77.2251	15.7174	1.35888
173	41.108	0.258	19.932	4.04	9.259	0.475	19.113	5.232	0.054	99.471	77.762	13.4008	0.824276
174	41.125	0.057	19.046	5.481	7.903	0.437	19.915	5.441	0.013	99.418	80.9609	13.8417	4.34319
175	41.173	0.025	19.392	5.061	8.364	0.474	18.771	6.274	0.004	99.538	79.089	16.1243	0.530127
176	41.176	0.17	21.403	2.116	9.459	0.415	19.517	4.995	0.023	99.274	77.8781	12.638	0
177	41.177	0.245	20.603	1.9	13.24	0.458	16.217	5.834	0.026	99.7	67.8331	15.0657	0
178	41.178	0.184	18.521	6.016	8.582	0.489	18.759	5.923	0.065	99.717	78.6446	15.2999	4.66339
179	41.193	0.009	19.38	4.992	8.29	0.449	18.797	6.295	0.03	99.435	79.2979	16.1785	0.345144
180	41.211	0.035	18.653	5.824	7.431	0.35	19.73	5.769	0.046	99.049	81.8707	14.7882	4.61214
181	41.231	0.202	21.321	1.708	12.226	0.381	17.17	5.493	0.039	99.771	70.8117	14.1147	0
182	41.239	0.01	19.43	4.872	8.513	0.508	18.557	6.286	0.038	99.453	78.5549	16.2257	0.0191821
183	41.267	0.184	18.922	5.108	10.149	0.68	18.135	5.31	0.015	99.77	74.886	13.8084	4.44693
184	41.286	0.234	19.939	4.038	9.219	0.534	19.082	5.293	0.089	99.714	77.6988	13.5616	0.686427
185	41.3	0.152	20.032	3.042	13.237	0.621	15.48	6.37	0.034	100.268	66.5487	16.6613	0
186	41.337	0.175	20.66	2.16	12.338	0.491	17.446	5.477	0.041	100.125	70.7784	13.9108	0
187	41.35	0.301	18.632	5.176	10.052	0.579	17.414	6.021	0.108	99.633	74.4699	15.8084	2.9815
188	41.356	0.225	20.433	2.298	12.846	0.502	16.453	5.933	0.054	100.1	68.7056	15.2741	0
189	41.385	0.201	18.609	5.643	8.996	0.478	18.233	5.941	0.015	99.501	77.4128	15.5027	4.06191
190	41.4	0.209	18.536	5.899	9.015	0.525	18.054	6.118	0.068	99.824	77.1165	15.9884	3.84697
191	41.431	0.128	19.712	4.701	9.521	0.608	18.24	5.537	0.044	99.922	76.2272	14.4427	0.949346
192	41.435	0.195	19.854	4.235	9.177	0.469	18.644	5.538	0.024	99.571	77.4883	14.3352	0.423083
193	41.438	0.113	21.802	1.502	10.755	0.464	18.9	4.487	0.035	99.496	75.0027	11.4555	0
194	41.46	0.237	19.375	3.937	11.65	0.471	17.035	5.944	0.033	100.142	71.4546	15.3471	0.666867
195	41.464	0.176	21.162	1.238	12.403	0.357	17.195	5.676	0.024	99.695	70.5926	14.4528	0
196	41.472	0.295	20.924	2.814	9.326	0.442	19.279	4.947	0.048	99.547	77.8519	12.6714	0
197	41.473	0.288	20.912	2.869	9.154	0.425	19.697	4.811	0.039	99.668	78.5508	12.2256	0
198	41.479	0.16	18.572	5.829	9.047	0.574	17.892	6.284	0.04	99.877	76.8057	16.437	3.36338
199	41.491	0.039	18.96	5.484	9.192	0.596	17.86	6.129	0.034	99.785	76.4653	16.0679	2.15993
200	41.506	0.226	20.011	3.114	12.899	0.581	16.333	5.84	0.035	100.545	68.3339	15.1197	0

## Sheet: Table S7
Table S7. Representative compositions of Cr-spinel xenocrysts from the Aldanskaya dyke (1-20); Ogonek (21-40); Sputnik (41, 60); Gornaya (61-80) and Perevalnaya (81-100) pipes.
Total iron expressed as FeO; n.d. = not detected.
№	TiO2	Al2O3	Cr2O3	FeO	MnO	MgO	Nb2O5	NiO	V2O3	Total
1	0.427	11.017	54.214	21.785	0.235	11.079	0	0.103	0.38	99.24
2	0.359	20.207	41.375	26.622	0.247	10.072	0.005	0.137	0.22	99.244
3	0.041	47.996	20.435	13.528	0.119	16.165	0.004	0.15	0.218	98.656
4	0.112	11.367	56.756	19.897	0.246	10.448	0	0.059	0.368	99.253
5	0	26.039	44.407	14.972	0.19	13.468	0.01	0.062	0.107	99.255
6	0.222	21.028	42.622	24.842	0.241	9.953	0.003	0.092	0.259	99.262
7	0.189	12.377	55.846	19.509	0.205	10.73	0	0.069	0.35	99.275
8	0.227	30.833	33.788	21.047	0.199	13.246	0	0.134	0.228	99.702
9	0.027	23.617	47.036	15.599	0.204	12.613	0	0.032	0.148	99.276
10	0.03	11.771	56.825	19.34	0.23	10.694	0	0.064	0.336	99.29
11	0.131	12.405	55.459	20.141	0.241	10.483	0	0.061	0.375	99.296
12	0.26	12.485	54.715	20.68	0.222	10.538	0	0.059	0.341	99.3
13	0.502	19.099	48.958	17.938	0.222	12.148	0.002	0.097	0.343	99.309
14	0.037	32.762	37.8	14.219	0.178	14.157	0.004	0.09	0.081	99.328
15	0.027	14.853	53.529	19.231	0.231	11.035	0.016	0.057	0.354	99.333
16	0.669	7.51	57.798	20.863	0.206	11.958	0	0.141	0.194	99.339
17	0.342	11.154	56.643	19.608	0.238	10.888	0	0.074	0.393	99.34
18	0	24.23	46.708	15.447	0.202	12.571	0.018	0.035	0.194	99.405
19	0.314	13.053	55.082	19.271	0.206	11.131	0.006	0.057	0.302	99.422
20	0.004	8.313	62.626	19.241	0.313	9.102	0	0.048	0.208	99.855
21	0.013	13.838	54.89	20.902	0.288	8.327	0	0.027	0.257	98.542
22	0.081	31.722	36.357	15.904	0.238	13.839	0.011	0.033	0.47	98.655
23	0.073	38.708	29.143	14.997	0.185	15.301	0.006	0.119	0.145	98.677
24	0.697	13.27	49.803	25.326	0.257	9.545	0.029	0.111	0.401	99.439
25	0.969	10.231	55.279	21.652	0.252	10.497	0	0.118	0.442	99.44
26	0.113	27.677	41.023	16.511	0.202	13.658	0	0.055	0.202	99.441
27	0.023	21.392	47.832	18.894	0.327	10.838	0	0.027	0.144	99.477
28	0.254	11.696	56.494	19.735	0.291	10.678	0	0.063	0.388	99.599
29	0.596	11.689	56.43	19.002	0.326	11.114	0.038	0.076	0.33	99.601
30	0.074	10.931	58.803	20.729	0.406	8.485	0.008	0.004	0.167	99.607
31	0.46	32.339	19.354	35.408	0.235	10.638	0	0.436	0.255	99.125
32	0.035	9.891	60.28	21.533	0.398	8.009	0.013	0.033	0.202	100.394
33	0.16	21.045	43.991	23.477	0.276	10.67	0	0.1	0.259	99.978
34	0.611	12.381	53.941	21.607	0.323	10.904	0.005	0.103	0.345	100.22
35	0	13.558	56.801	19.832	0.335	9.417	0.056	0.022	0.2	100.221
36	0.047	14.592	55.235	19.357	0.285	10.472	0.029	0.039	0.179	100.235
37	0.013	18.488	51.269	19.81	0.388	10.195	0	0.027	0.065	100.255
38	0.046	16.964	51.593	19.584	0.299	11.387	0	0.07	0.322	100.265
39	0.312	18.491	48.024	23.547	0.265	9.422	0	0.054	0.152	0
40	0.842	9.847	55.071	24.036	0.254	9.704	0	0.119	0.408	100.281
41	0.022	6.91	63.18	20.09	0.318	9.07	n.d.	0.034	n.d.	99.624
42	0.072	24.51	43.96	19.97	0.231	10.91	n.d.	0.012	n.d.	99.665
43	0.04	16.13	52.75	20.82	0.274	9.67	n.d.	0.004	n.d.	99.688
44	0.055	15.8	53.72	18.34	0.21	11.5	n.d.	0.064	n.d.	99.689
45	0.015	8.13	59.89	22.39	0.299	8.93	n.d.	0.04	n.d.	99.694
46	0.106	20.36	48.43	19.91	0.261	10.58	n.d.	0.051	n.d.	99.698
47	0.023	42	28.7	11.45	0.153	17.28	n.d.	0.094	n.d.	99.7
48	0.076	14.27	53.79	20.59	0.288	10.64	n.d.	0.049	n.d.	99.703
49	0.301	12.8	53.07	23.38	0.249	9.83	n.d.	0.09	n.d.	99.72
50	0.034	29.87	40.18	15	0.194	14.36	n.d.	0.113	n.d.	99.751
51	0.065	33.3	37.14	14.9	0.177	14.17	n.d.	0.032	n.d.	99.784
52	0.05	12.8	56.18	21.26	0.325	9.18	n.d.	0	n.d.	99.795
53	0.041	15.89	54.16	18.15	0.235	11.26	n.d.	0.06	n.d.	99.796
54	0.059	13.9	56.38	18.26	0.242	10.92	n.d.	0.051	n.d.	99.812
55	0.756	24.73	38.36	24.51	0.285	11.02	n.d.	0.155	n.d.	99.816
56	0.711	17.84	49.15	20.1	0.138	11.87	n.d.	0.046	n.d.	99.855
57	0.047	17.79	52.14	18.18	0.247	11.43	n.d.	0.035	n.d.	99.869
58	0.248	30.63	32.88	23.11	0.212	12.63	n.d.	0.187	n.d.	99.897
59	0.088	12.63	57.02	19.39	0.221	10.55	n.d.	0.026	n.d.	99.925
60	0.051	11.1	57.28	22.92	0.309	8.43	n.d.	0	n.d.	100.09
61	0.019	33.961	35.276	14.546	0.182	14.85	0.022	0.077	0.177	99.11
62	0.034	35.442	34.347	12.819	0.184	16.028	0	0.105	0.155	99.114
63	0.046	28.007	41.056	15.755	0.192	13.823	0	0.093	0.173	99.145
64	0.054	22.702	47.408	15.91	0.208	12.668	0.027	0.034	0.134	99.145
65	0.195	22.667	45.585	17.227	0.267	12.927	0.005	0.079	0.199	99.151
66	0.092	29.61	38.402	17.379	0.216	13.223	0	0.059	0.2	99.181
67	0.098	24.963	42.986	18.356	0.226	12.378	0	0.039	0.164	99.21
68	0.06	14.009	53.416	19.995	0.254	11.107	0	0.085	0.327	99.253
69	0.299	12.948	56.105	18.076	0.255	11.114	0	0.058	0.401	99.256
70	0.266	10.599	55.909	21.038	0.236	10.782	0.005	0.091	0.332	99.258
71	0.133	10.073	57.82	18.689	0.204	12.66	0.001	0.1	0.287	99.967
72	0.005	12.66	56.557	18.804	0.286	11.14	0.004	0.07	0.442	99.968
73	0.04	35.052	33.489	14.453	0.192	15.052	0	0.077	0.149	98.504
74	0.019	35.444	33.77	13.739	0.198	15.56	0	0.138	0.123	98.991
75	0.022	18.563	51.159	19.511	0.286	10.138	0.008	0.022	0.077	99.786
76	0	16.403	53.597	19.421	0.347	9.897	0.013	0.022	0.091	99.791
77	0.113	9.716	57.465	20.107	0.197	11.725	0.011	0.111	0.347	99.792
78	0.098	20.134	48.656	17.812	0.251	12.481	0.001	0.073	0.295	99.801
79	0.052	26.852	42.652	16.963	0.253	12.972	0.012	0.018	0.145	99.919
80	0.058	15.804	53.655	18.382	0.254	11.362	0.002	0.065	0.348	99.93
81	0.183	16.61	51.42	18.63	0.222	12.31	n.d.	0.098	n.d.	99.473
82	0.068	30.74	38.9	15.25	0.219	14.19	n.d.	0.108	n.d.	99.475
83	0.042	35.1	32.49	16.93	0.168	14.55	n.d.	0.196	n.d.	99.476
84	0.015	18.46	50.11	18.96	0.285	11.61	n.d.	0.045	n.d.	99.485
85	0.1	23.37	44.69	19.33	0.311	11.61	n.d.	0.086	n.d.	99.497
86	0.057	37.14	29.79	17.28	0.166	14.87	n.d.	0.207	n.d.	99.51
87	0.392	25.06	43.62	14.89	0.165	15.46	n.d.	0.126	n.d.	99.713
88	0.027	13.71	55.27	21.5	0.344	9.15	n.d.	0.045	n.d.	100.046
89	0.084	24.1	43.12	20.72	0.261	11.94	n.d.	0.06	n.d.	100.285
90	0.275	29.57	36.63	18.2	0.164	15.29	n.d.	0.187	n.d.	100.316
91	0.32	15.44	53.86	17.43	0.218	12.97	n.d.	0.091	n.d.	100.329
92	0.149	12.23	55.67	18.85	0.183	12.75	n.d.	0.165	n.d.	99.997
93	0.064	22.35	47.05	17.36	0.206	12.86	n.d.	0.052	n.d.	99.998
94	0.081	21.24	47.26	19.1	0.277	11.58	n.d.	0.05	n.d.	99.588
95	0.109	24.24	42.93	21.26	0.361	10.63	n.d.	0.069	n.d.	99.599
96	0.084	23.63	44.64	18.48	0.274	12.44	n.d.	0.063	n.d.	99.611
97	0.264	13.87	53.04	18.92	0.152	13.13	n.d.	0.114	n.d.	99.642
98	0.219	13.11	53.93	21.25	0.393	10.45	n.d.	0.054	n.d.	99.666
99	0.051	30.71	35.4	19.46	0.225	12.98	n.d.	0.129	n.d.	98.955
100	0.095	14.31	57.08	17.8	0.255	9.37	n.d.	0.053	n.d.	98.963

## Sheet: Table S8
Table S8. Mineral chemistry of Ilmenites from the Chompolo lamprophyres
	TiO2	Al2O3	Cr2O3	MnO	FeO	MgO	Nb2O5	NiO	V2O3	Total
Aldanskaya	55.129	0.182	2.248	0.284	30.915	11.203	0.011	0.209	0.256	100.437
Aldanskaya	53.921	0.196	1.283	0.314	34.381	10.529	0.022	0.177	0.25	101.073
Aldanskaya	43.095	0.003	2	0.383	50.887	4.641	0.038	0.027	0.154	101.228
Aldanskaya	50.291	0.211	1.353	0.29	40.698	8.131	0.021	0.141	0.275	101.411
Aldanskaya	51.27	0.153	2.661	0.324	37.258	9.323	0.049	0.135	0.247	101.42
Aldanskaya	49.184	0.009	0	0.731	50.937	0.436	0.12	0.016	0.115	101.548
Gornaya	49.461	0	0	1.358	49.916	0.271	0.124	0.006	0.126	101.262
Gornaya	44.271	0.088	0.072	0.039	53.171	2.071	0.01	0.081	0.23	100.033
Gornaya	44.414	0.076	0.042	0.076	53.73	1.547	0.021	0.046	0.234	100.186
Gornaya	44.423	0.074	0	0.121	54.556	0.913	0.047	0.024	0.233	100.391
Gornaya	44.813	0.09	0.079	0.111	53.446	1.429	0.037	0.03	0.453	100.488
Gornaya	44.072	0.101	0.082	0.267	54.407	1.09	0.029	0.016	0.228	100.292
Gornaya	33.845	0.299	1.075	0.151	59.834	2.69	0.001	0.024	0.794	98.713
Ogonek	51.22	0.004	0.072	1.336	47.62	0.16	0.073	0	0.121	100.606
Ogonek	43.354	0.015	0	0.659	55.183	0.202	0.003	0	0.521	99.937
Ogonek	45.966	0	0	2.593	50.596	0.249	0.086	0	0.029	99.519
Ogonek	48.18	0.026	0.068	0.157	49.356	1.25	0.019	0.001	0.584	99.641
Perevalnaya	43.22	0.012	0	0.076	56.35	0.722	n.d.	0	n.d.	100.38
Perevalnaya	43.59	0.106	0.016	0.175	56.23	0.583	n.d.	0.006	n.d.	100.7
Perevalnaya	40.26	0.017	0	0.118	61.1	0.456	n.d.	0.021	n.d.	101.97
Perevalnaya	46.43	0.021	0.081	0.247	52.86	2.94	n.d.	0.08	n.d.	102.66
Perevalnaya	49.29	0	0.014	0.475	49.5	1.76	n.d.	0.048	n.d.	101.09
Perevalnaya	43.41	0.083	0.002	0.121	55.91	0.62	n.d.	0.02	n.d.	100.17
Perevalnaya	39.46	0.036	0.011	0.202	58.2	0.865	n.d.	0.028	n.d.	98.8
Perevalnaya	42.12	0.135	0.224	0.107	54.67	1.75	n.d.	0.039	n.d.	99.04
Perevalnaya	41.89	0.036	0.032	0.134	56.62	0.492	n.d.	0.03	n.d.	99.24
Perevalnaya	41.42	0.12	0.004	0.079	56.77	1.14	n.d.	0.02	n.d.	99.56

## Sheet: Table S9
Table S9. Whole-rock major-oxide and trace-element compositions.
	Ald-1	Ald-2	Ald-3	Og-1	Og-2	Og-3	Og-4	Og-5	Int104
SiO2	38.04	49.21	56.74	48.94	49.78	47.72	45.37	41.43	54.15
TiO2	0.44	0.42	0.51	0.48	0.54	0.43	0.42	0.36	0.7
Al2O3	7.72	8.65	12.8	10.04	9.32	8.38	9.24	7.16	8.33
Fe2O3	4.77	6.38	6.48	5.71	6.21	5.53	6.13	6.22	8.57
MnO	0.05	0.07	0.04	0.06	0.07	0.14	0.07	0.11	0.07
MgO	13.85	15.53	9.91	9.1	5.92	0.79	11.08	1.56	10.71
CaO	11.94	5.26	1.56	7.64	9.2	16.23	3.87	18.98	6.07
Na2O	0.53	1.42	1.34	1.36	0.66	0.21	1.13	0.33	0.67
K2O	2.39	1.84	4.03	3.48	3.81	5.53	5.18	4.77	4.74
P2O5	0.18	0.33	0.08	0.27	0.29	0.36	0.23	0.31	0.92
BaO	0.07	0.09	0.13	0.25	0.1	0.09	0.19	0.09	0.15
SO3	0.35	0.53	0.2	0.73	1.27	0.34	1.05	0.77	0.1
V2O5	0.01	0.01	0.01	0.02	0.02	0.01	0.01	0.01	0.02
Cr2O3	0.05	0.11	0.01	0.07	0.08	0.13	0.07	0.1	0.14
NiO	0.04	0.09	0.06	0.06	0.07	0.1	0.05	0.08	0.02
LOI	19.24	9.64	5.95	11.69	12.74	14.15	15.98	17.41	3.96
Sum	99.69	99.6	99.86	99.89	100.07	100.12	100.09	99.69	99.33
1Mg#	0.85	0.83	0.75	0.76	0.65	0.22	0.78	0.33	0.71
Rb	51	42	86	85	90	105	100	91	173
Sr	323	635	168	481	329	483	497	541	467
Y	12.6	12.1	12.1	13.4	17.7	15.1	10.1	11.1	13.8
Zr	108	107	146	170	164	102	132	94	109
Nb	6.6	5.4	7.2	6.1	8.7	10.1	5.4	5.2	4.2
Cs	2.5	2	1.7	5.2	6.2	1.17	2.5	1.12	1.26
Ba	579	721	1012	1992	734	759	1413	769	1174
La	25	37	39	35	36	33	27	29	19.5
Ce	49	71	75	66	66	60	52	56	40
Pr	5.6	8.1	8.5	7.4	8	7.2	5.9	6.4	5.2
Nd	20	30	30	28	30	27	19.8	22	21
Sm	4.1	5.4	4.8	4.7	5.3	4.9	3.8	4.4	4.6
Eu	0.99	1.39	1.2	1.17	1.39	1.41	0.79	1.03	1.2
Gd	3.4	4.3	3.6	3.9	4.5	4.1	3	3.4	3.8
Tb	0.43	0.51	0.46	0.48	0.62	0.49	0.38	0.43	0.46
Dy	2.3	2.4	2.2	2.5	3.2	2.4	2	2.2	2.5
Ho	0.43	0.46	0.4	0.46	0.59	0.49	0.39	0.39	0.48
Er	1.18	1.1	1	1.24	1.7	1.24	1.1	1.1	1.24
Tm	0.19	0.16	0.15	0.19	0.26	0.19	0.16	0.16	0.19
Yb	1.24	1.02	0.99	1.11	1.59	1.11	0.96	0.92	1.13
Lu	0.18	0.16	0.15	0.18	0.24	0.17	0.15	0.14	0.18
Hf	3	2.9	3.9	4.5	4.5	3	3.3	2.7	2.9
Ta	0.4	0.32	0.4	0.35	0.51	0.32	0.36	0.29	0.3
Pb	na	na	na	na	na	na	16.6	12.1	na
Th	6.8	8.1	7.8	8.1	15.4	7.1	6	6.2	4.2
U	1.83	1.08	0.7	1.4	1.97	1.86	1.31	0.89	1.13
(La/Yb)N	13.93	24.89	26.68	21.38	15.56	20.18	19.08	21.54	11.72
2Eu/Eu	0.79	0.85	0.85	0.8	0.85	0.94	0.68	0.79	0.86
1-3 - Aldanskaya dyke; 4-8 - Ogonek pipe; 9 - Intrusion 104. 1Mg# = atomic ratio of Mg/(Mg+Fe2+); 2Eu/Eu= (Eun/(Smn+Gdn)/2

## Sheet: Table S10
Table S10. Sr-Nd isotopic ratios of Ogonek pipe rocks.
Sample	Age, Ma	Rb, ppm	Sr, ppm	87Rb/86 Sr	87Sr/86 Sr	87Sr/ 86 Srt	Sm, ppm	Nd, ppm	147Sm/144Nd	143Nd/144Nd	εNdt
Og-4	138	106.11	487.7	0.6297	0.7108	0.70954	4.048	22.839	0.1072	0.5115	-20.44
Og-5	138	25.141	134.55	0.5407	0.7088	0.70775	9.576	26.395	0.2193	0.51163	-20.03
